# Supplementary material for: Tryptophan Metabolism Induced by TDO2 Promotes Prostatic Cancer Chemotherapy Resistance in a Ahr/C-Myc Dependent Manner
Source: Research Square preprint supplement (doi:10.21203/rs.3.rs-735249/v1), 2021-08-17

Figure 1C (TDO2)


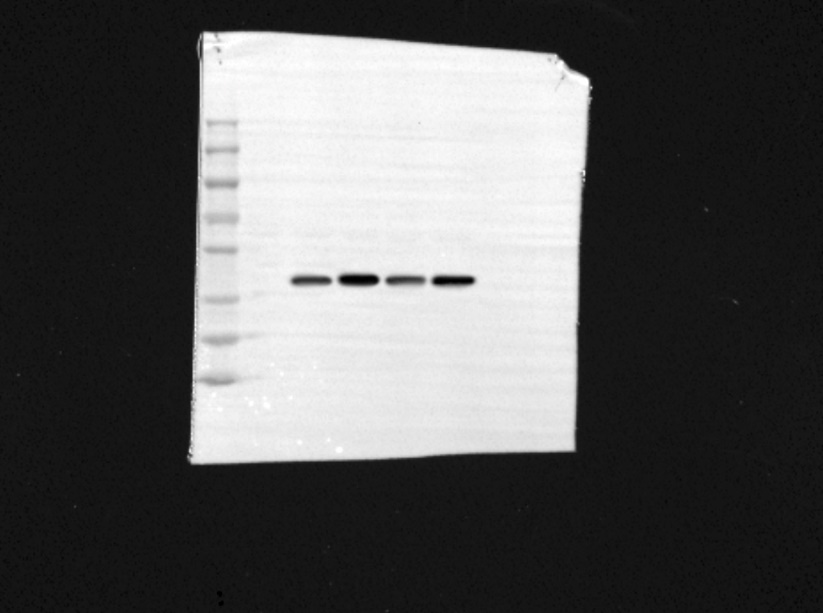


Figure 1C (Actin)


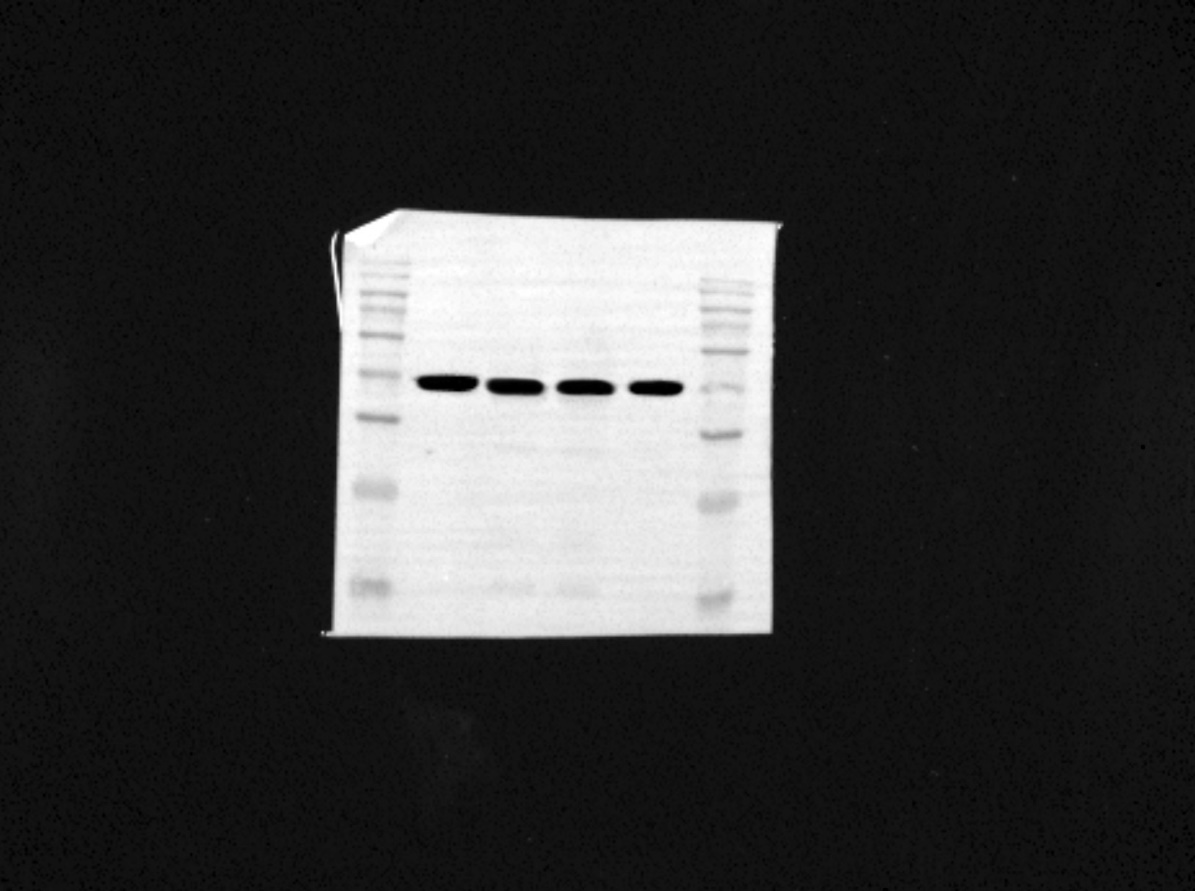


Figure 2A (AhR)


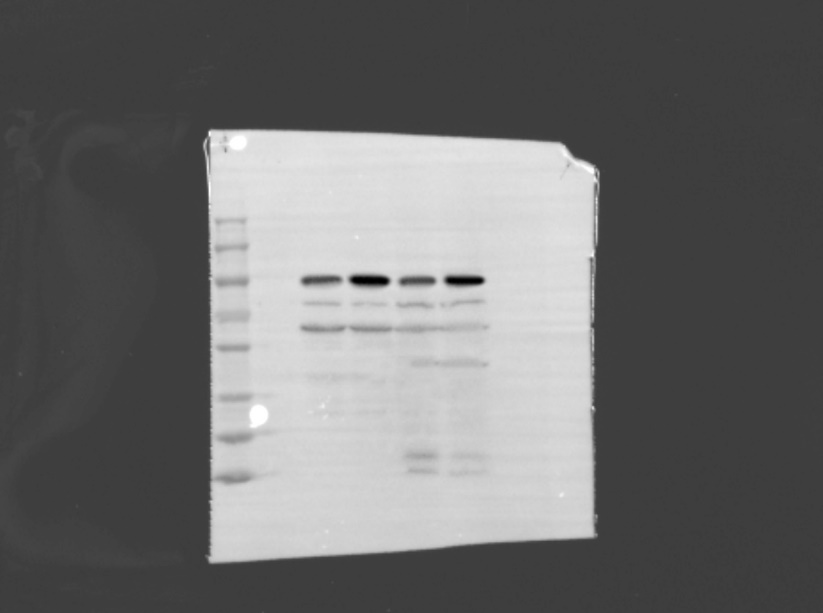


Figure 2A (Actin)


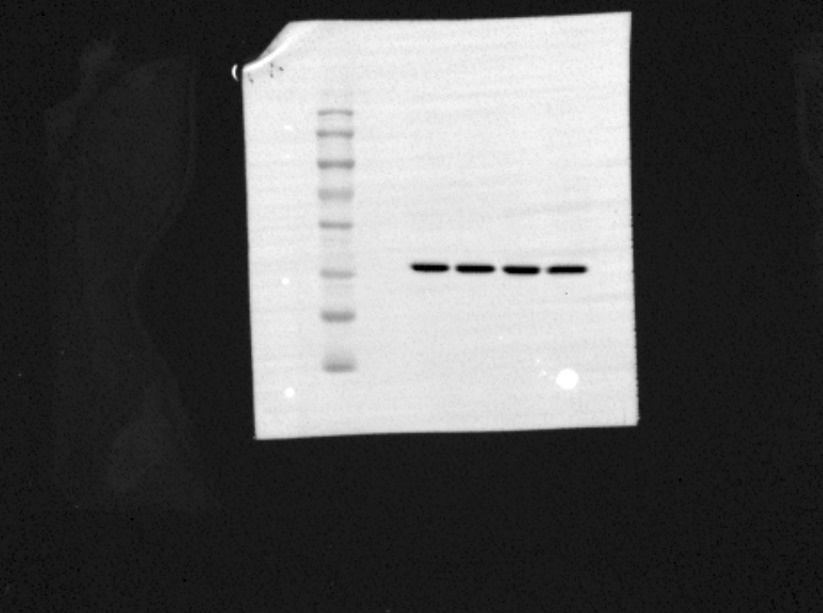


Figure 3A (c-Myc)


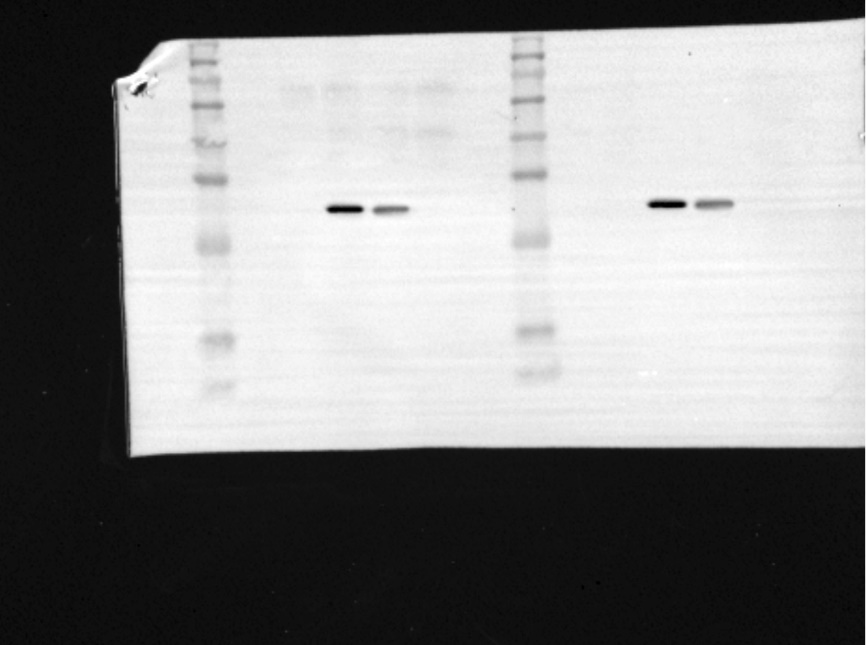


Figure 3A (actin)


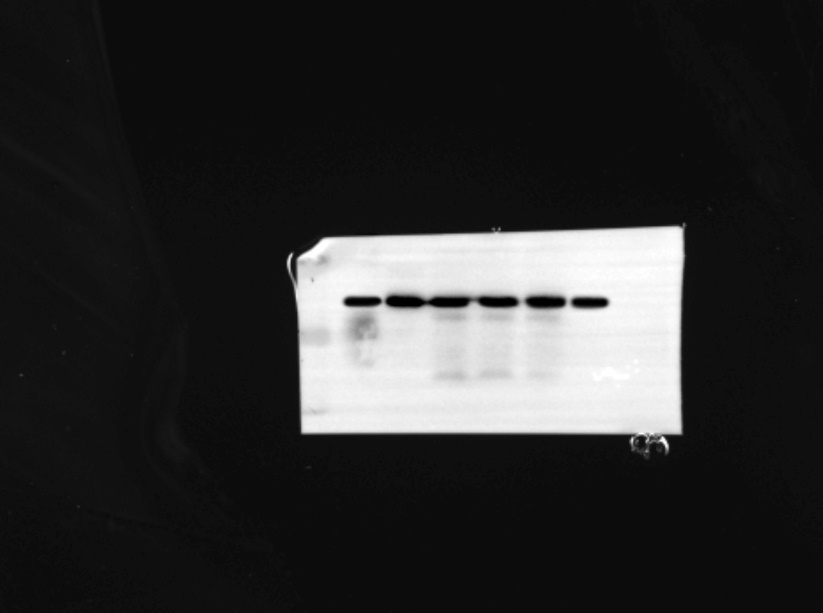


Figure 3B (c-Myc)


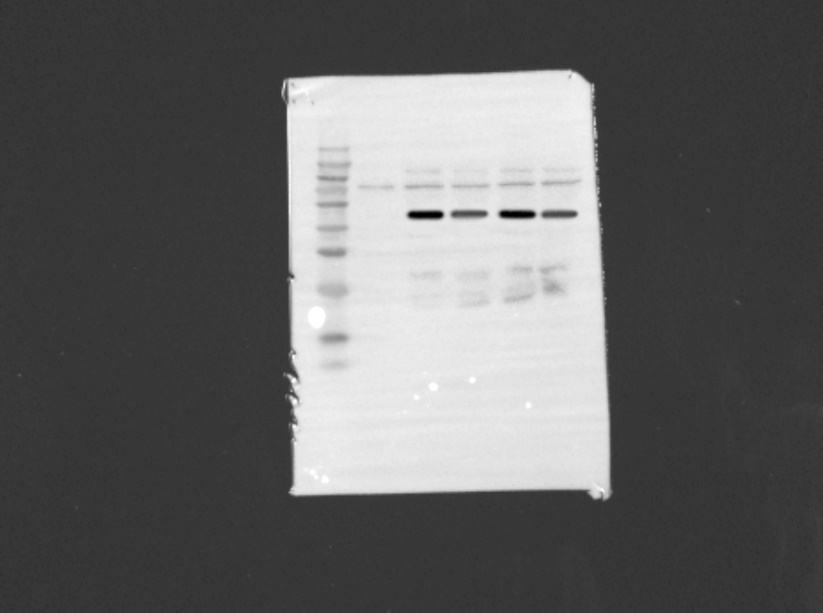


Figure 3B (actin)


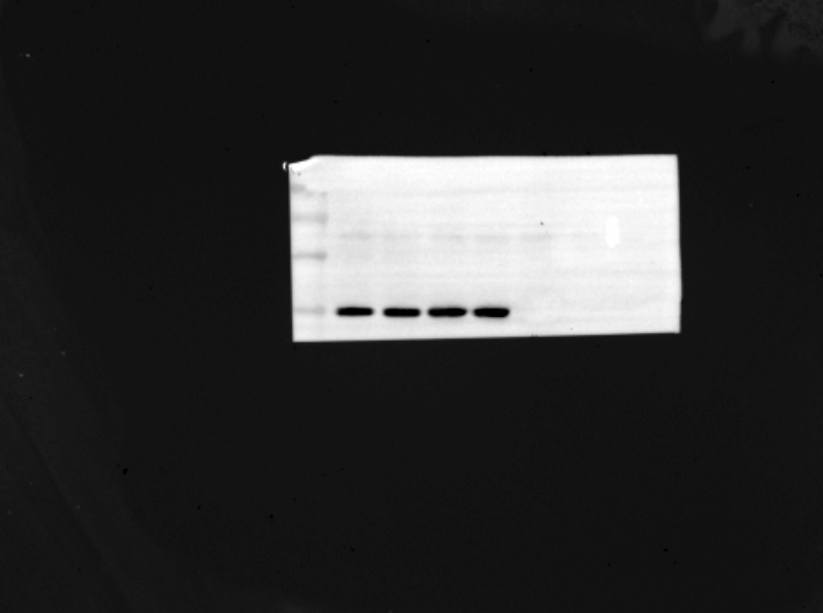


Figure 4A (c-Myc)


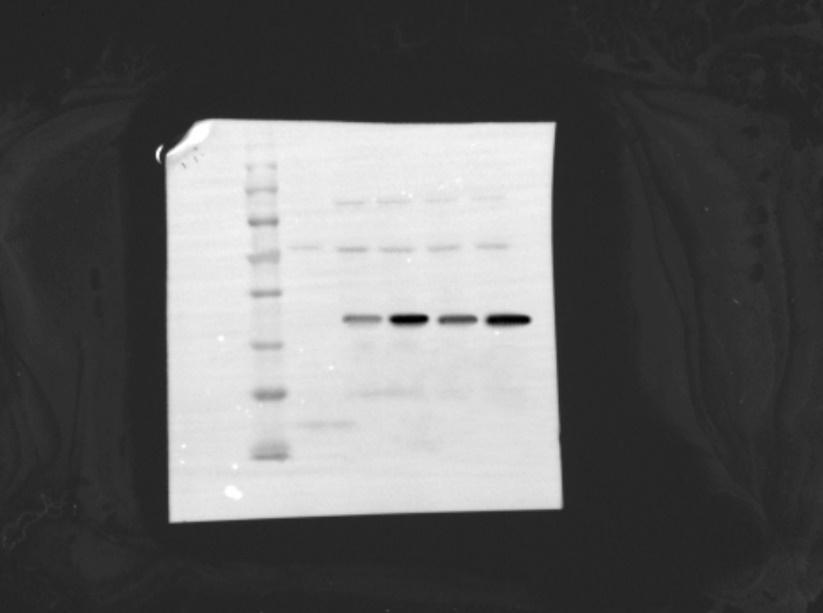


Figure 4 (actin)


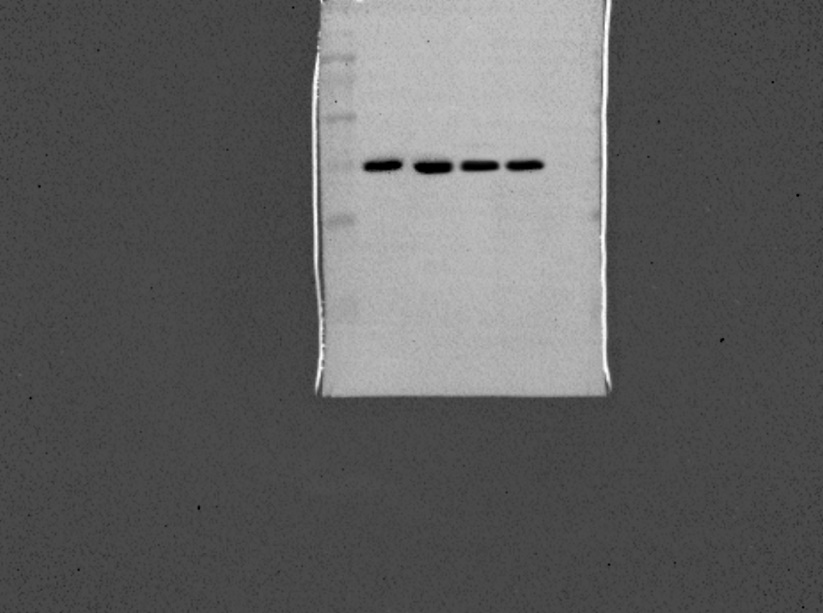


Figure 4C (p-gp)


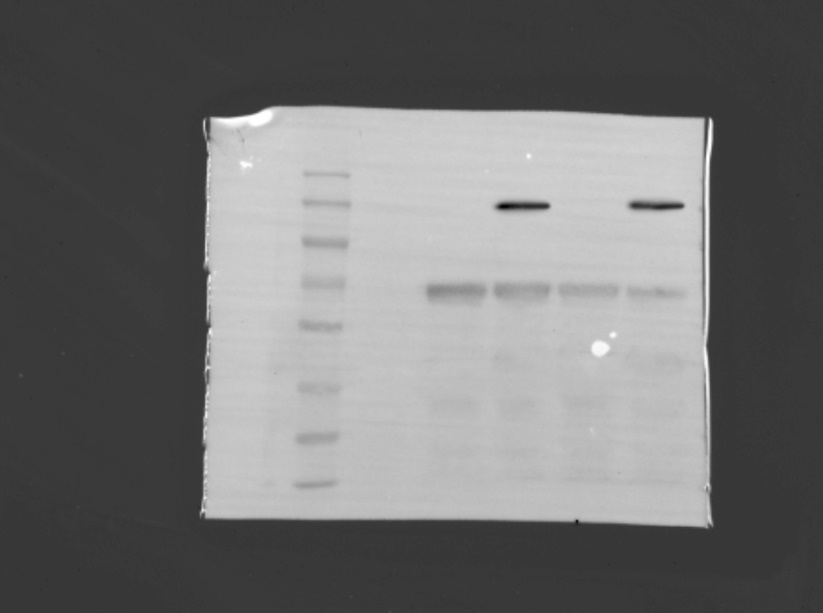


Figure 4C (ACTIN)


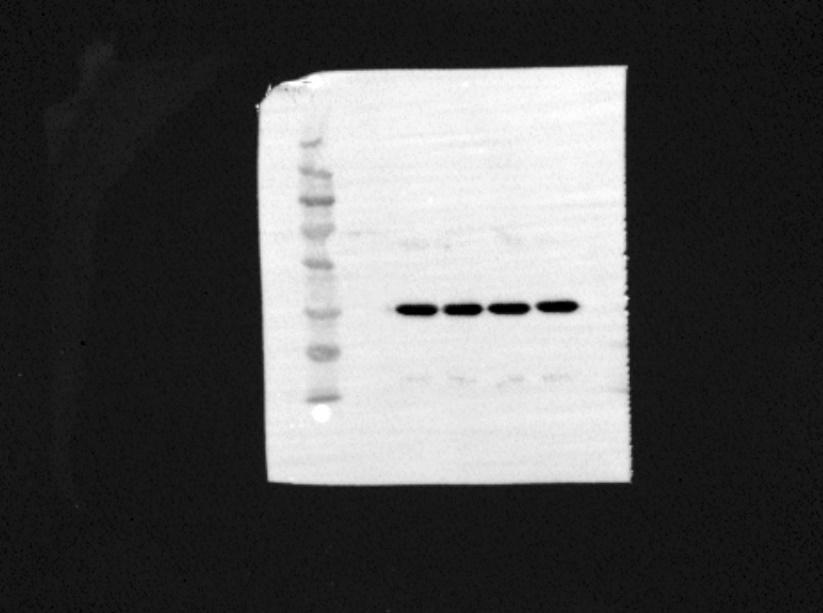

Supplement: Supplementary file 1 [file 36bb554d5f9ccc9862df9491.docx]
